# Supplementary material for: High performance and gate-controlled GeSe/HfS2 negative differential resistance device
Source: Royal Society of Chemistry journal article supplement (doi:10.1039/d1ra07276e), 2022-01-01
Supplement: d1ra07276e1.pdf [file d1ra07276e1.pdf]

## Supplementary Data

### High Performance and Gate-controlled GeSe/HfS<sub>2</sub> Negative Differential Resistance Device

Amir Muhammad Afzal\*<sup>1</sup>, Muhammad Zahir Iqbal<sup>2</sup>, Muhammad Waqas Iqbal<sup>1</sup>, Thamer Alomayri<sup>3</sup>, Ghulam Dastgeer<sup>4</sup>, Yasir Javed<sup>5</sup>, Naveed Akhtar Shad<sup>6</sup>, Rajwali Khan<sup>7</sup> M Munir Sajid<sup>6</sup>, R. Neffati<sup>8,9</sup>, Tasawar Abbas<sup>1</sup>, Qudrat Ullah Khan<sup>10</sup>

<sup>1</sup>Department of Physics, Riphah International University, 13 Raiwind Road, Lahore, Pakistan

<sup>2</sup>Nanotechnology Research Laboratory, Faculty of Engineering Sciences, GIK Institute of Engineering Sciences and Technology, Topi 23640, Khyber Pakhtunkhwa, Pakistan

<sup>3</sup>Department of Physics, Faculty of Applied Science, Umm-Al-Qura University, 21955, Makkah, Saudi Arabia

<sup>4</sup>Department of Physics & Astronomy and Graphene Research Institute-Texas Photonics Center International Research Center (GRI-TPC IRC), Sejong University, Seoul 05006, Korea

<sup>5</sup>Department of Physics, University of Agriculture, Faisalabad, 38000, Pakistan

<sup>6</sup>Department of Physics, GC University, Faisalabad, 38000, Pakistan

<sup>7</sup>Department of Physics Lakki Marwat University, Lakki Marwat, KPK Pakistan

<sup>8</sup>Department of Physics, Faculty of Science, King Khalid University; P.O. Box 9004, Abha, Saudi Arabia.

<sup>9</sup>Laboratoire de Physique de la Matière Condensée, Département de Physique, Faculté des Sciences de Tunis, Université Tunis El Manar, Campus universitaire, 1060 Tunis, Tunisia

<sup>10</sup>Key Laboratory of Optoelectronic Devices and Systems, College of Physics and Optoelectronic Engineering, Shenzhen University, Shenzhen, China

\* Corresponding author: amirafzal461@gmail.com

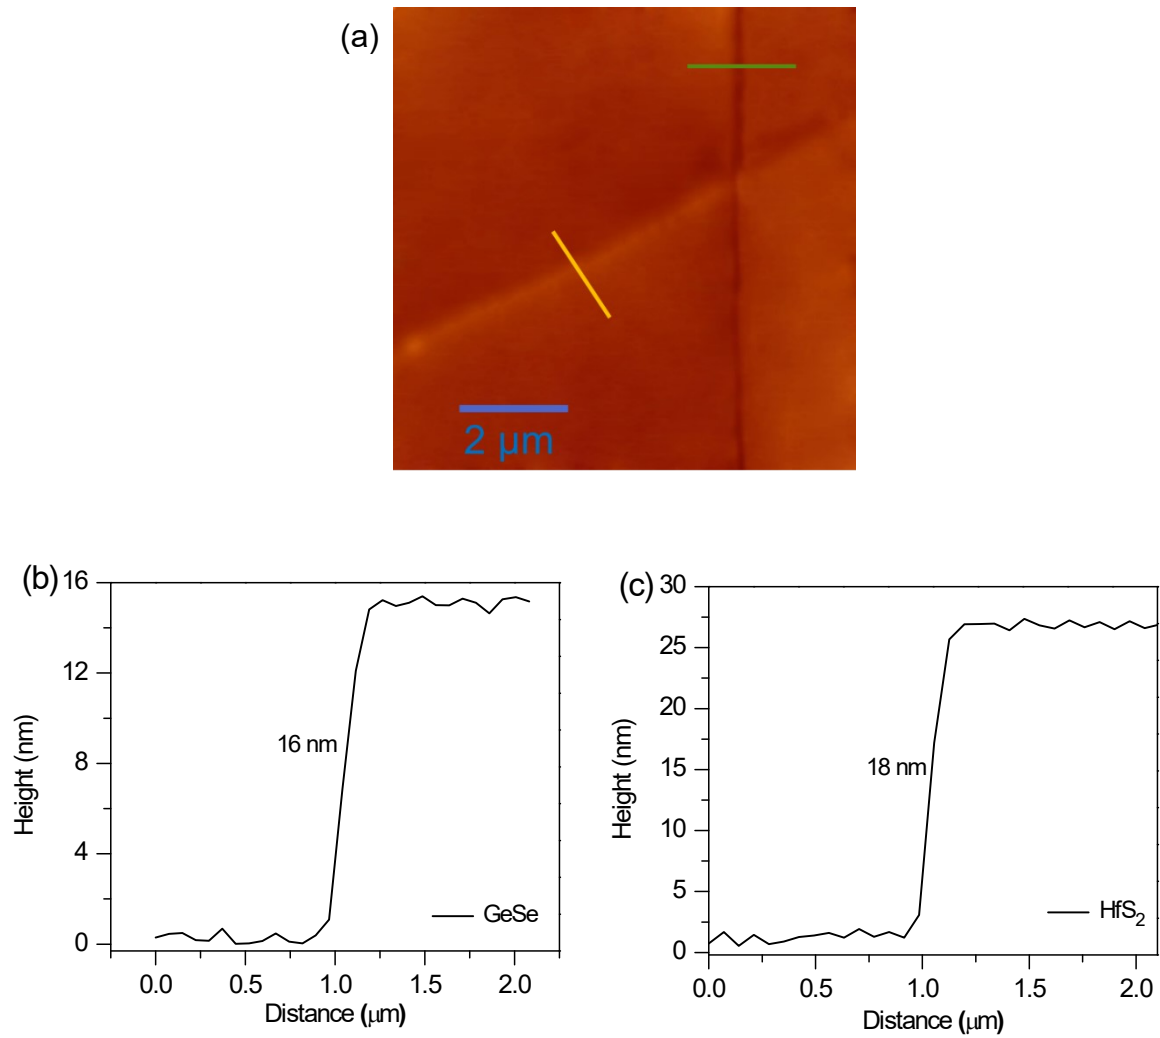

**Figure S1.** (a) Atomic force microscopy image of GeSe/HfS<sub>2</sub> heterostructure (b) Height profile of GeSe flake. The thickness of GeSe flake is 16 nm (c) Height profile of HfS<sub>2</sub> flake. The thickness of HfS<sub>2</sub> is 18 nm

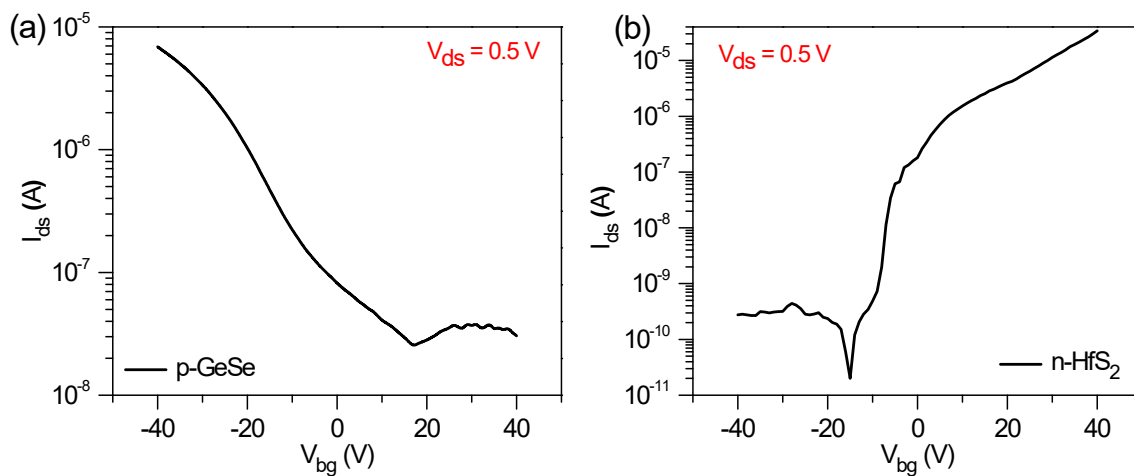

**Figure S2.** Transfer curves of (a) p-GeSe with Pd/Au (b) n- HfS<sub>2</sub> with Sc/Au

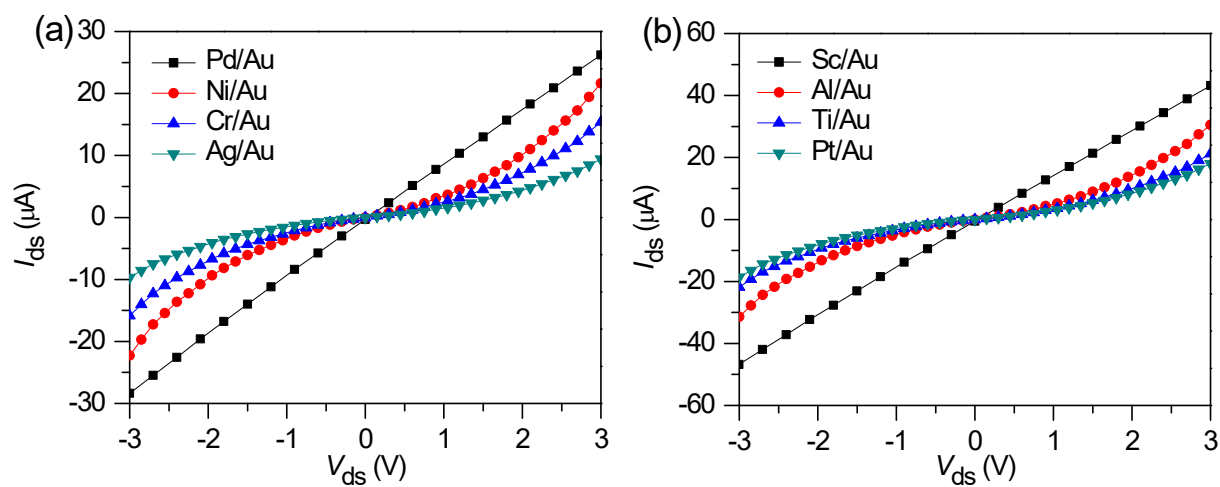

**Figure S3.** Current-voltage ( $I_{ds}$ - $V_{ds}$ ) characteristics of (a) p-GeSe with different electrodes (b) n-HfS<sub>2</sub> with different electrodes

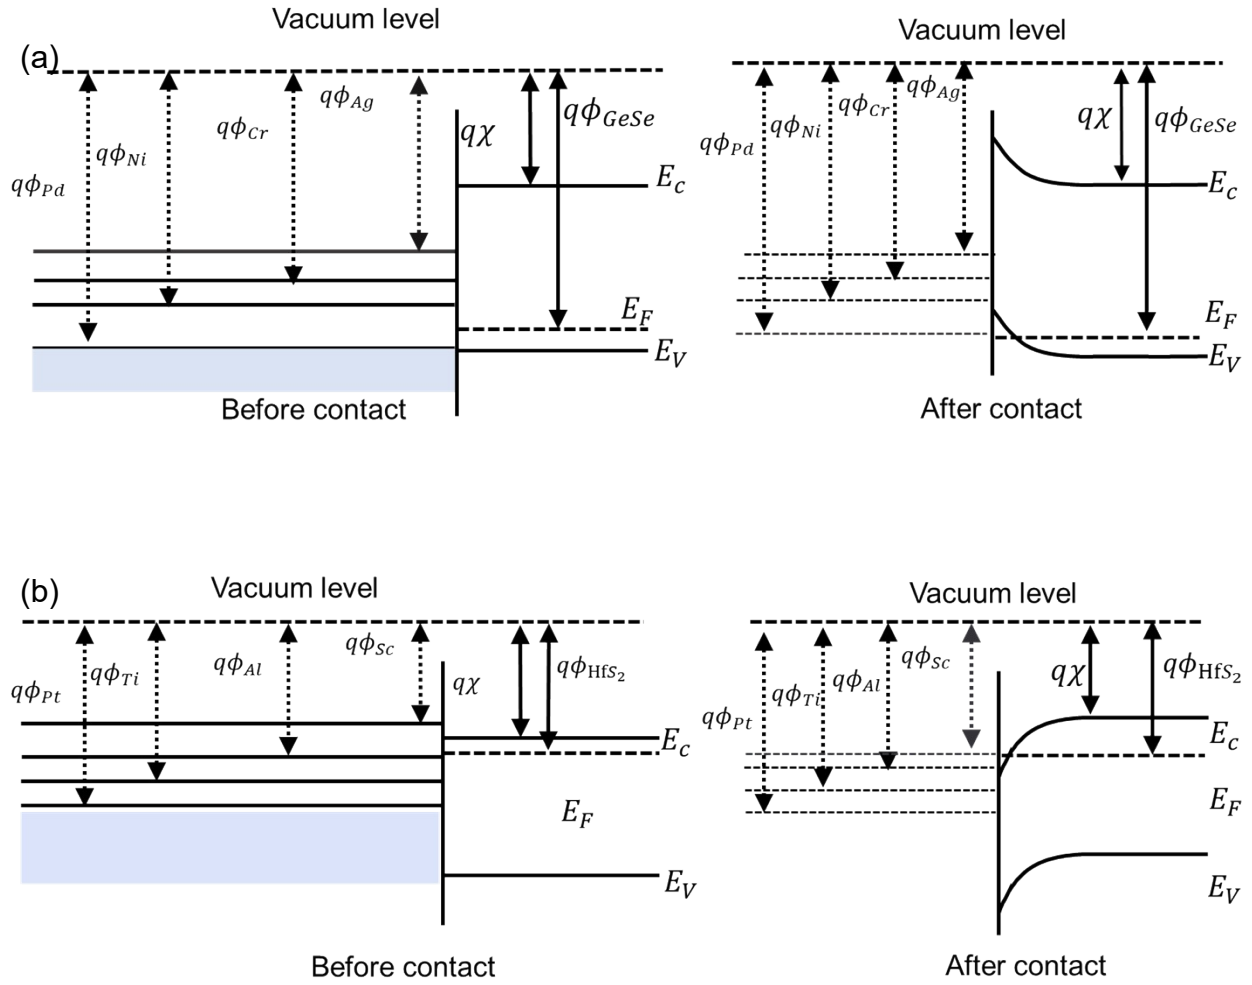

**Figure S4.** Band energy diagram of metal-TMDs (GeSe and HfS<sub>2</sub>) junction before contact and after contact (a) p-GeSe (b) n-HfS<sub>2</sub>

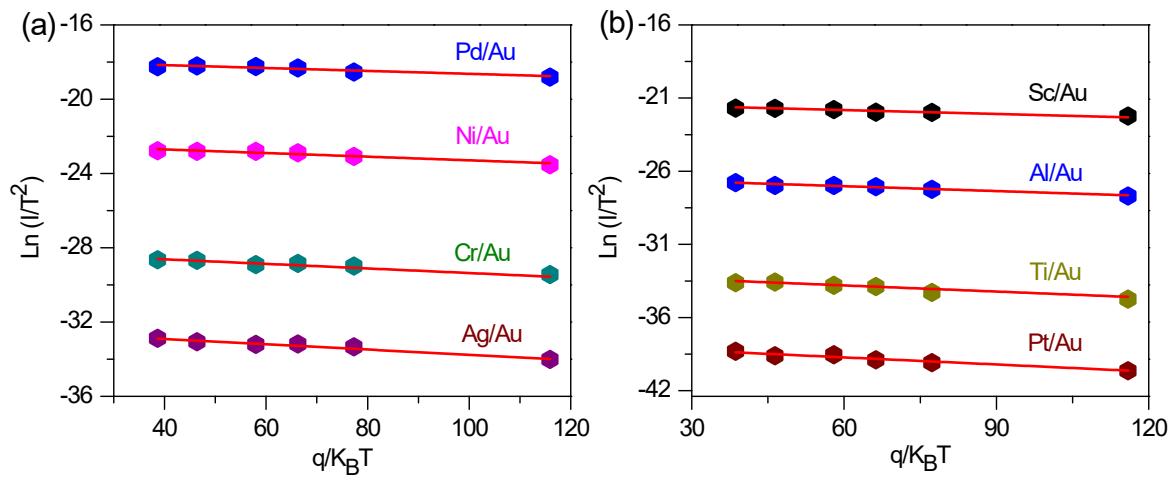

**Figure S5.** Richardson's plot ( $\ln(I/T^2)$  vs  $q/K_B T$ ) to calculate the barrier height for (a) GeSe (b) HfS<sub>2</sub>

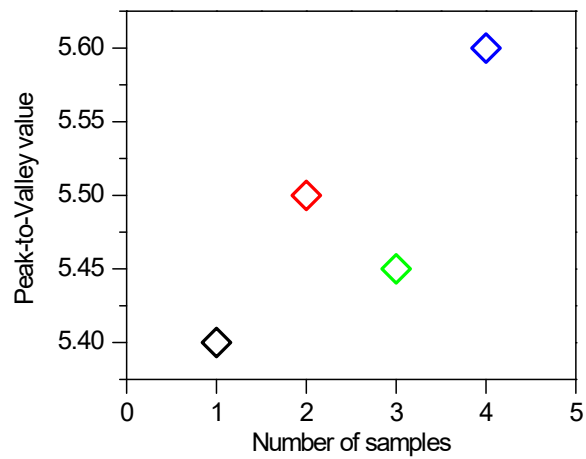

**Figure S6.** Peak to valley ratio of different samples

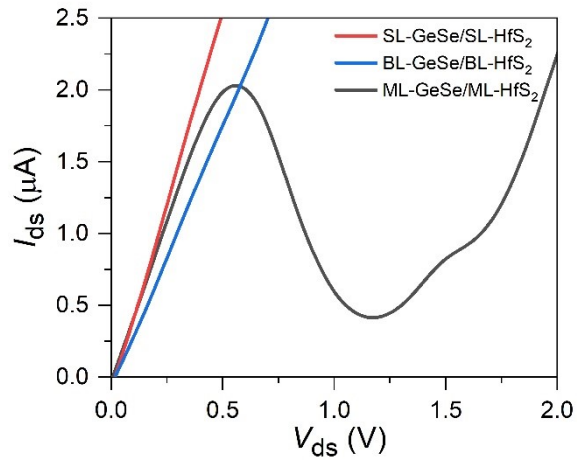

**Figure S7.** Effect of thickness on the performance of p-GeSe/n-HfS<sub>2</sub> NDR device

| Sr. No. | Heterostructure                     | Peak-to-valley current ratio | Ref.      |
|---------|-------------------------------------|------------------------------|-----------|
| 1       | BP/SnSe <sub>2</sub>                | 2.8                          | 1         |
| 2       | MoS <sub>2</sub> /WSe <sub>2</sub>  | 0.6                          | 2         |
| 3       | MoS <sub>2</sub> /WSe <sub>2</sub>  | 1.6                          | 3         |
| 4       | WSe <sub>2</sub> /SnSe <sub>2</sub> | 4                            | 4         |
| 5       | BP/ReSe <sub>2</sub>                | 3.3                          | 5         |
| 6       | WSe <sub>2</sub>                    | 1.5                          | 6         |
| 7       | BP/ReS <sub>2</sub>                 | 6.9                          | 7         |
| 8       | GeSe/HfS <sub>2</sub>               | 9.8                          | This work |

Table 1. Comparison of p-GeSe/n-HfS<sub>2</sub> NDR devices with previously reported value.

## References

- (1) Yan, R.; Fathipour, S.; Han, Y.; Song, B.; Xiao, S.; Li, M.; Ma, N.; Protasenko, V.; Muller, D. A.; Jena, D. J. N. I. Esaki diodes in van der Waals heterojunctions with broken-gap energy band alignment. **2015**, *15* (9), 5791-5798.
- (2) Roy, T.; Tosun, M.; Cao, X.; Fang, H.; Lien, D.-H.; Zhao, P.; Chen, Y.-Z.; Chueh, Y.-L.; Guo, J.; Javey, A. J. A. n. Dual-gated MoS<sub>2</sub>/WSe<sub>2</sub> van der Waals tunnel diodes and transistors. **2015**, *9* (2), 2071-2079.
- (3) Nourbakhsh, A.; Zubair, A.; Dresselhaus, M. S.; Palacios, T. J. N. I. Transport properties of a MoS<sub>2</sub>/WSe<sub>2</sub> heterojunction transistor and its potential for application. **2016**, *16* (2), 1359-1366.
- (4) Fan, S.; Vu, Q. A.; Lee, S.; Phan, T. L.; Han, G.; Kim, Y.-M.; Yu, W. J.; Lee, Y. H. J. A. n. Tunable negative differential resistance in van der Waals heterostructures at room temperature by tailoring the interface. **2019**, *13* (7), 8193-8201.
- (5) Srivastava, P. K.; Hassan, Y.; Gebredingle, Y.; Jung, J.; Kang, B.; Yoo, W. J.; Singh, B.; Lee, C. J. S. Multifunctional van der Waals broken-gap heterojunction. **2019**, *15* (11), 1804885.
- (6) Paletti, P.; Yue, R.; Hinkle, C.; Fullerton-Shirey, S. K.; Seabaugh, A. J. n. D. M.; Applications. Two-dimensional electric-double-layer Esaki diode. **2019**, *3* (1), 1-7.
- (7) Shim, J.; Oh, S.; Kang, D.-H.; Jo, S.-H.; Ali, M. H.; Choi, W.-Y.; Heo, K.; Jeon, J.; Lee, S.; Kim, M.; et al. Phosphorene/rhenium disulfide heterojunction-based negative differential resistance device for multi-valued logic. *Nature Communications* **2016**, *7* (1), 13413. DOI: 10.1038/ncomms13413.
